# Supplementary material
Source: PubMed Central journal article supplement (PMC6213029)
Supplement: am8b10992_si_001.pdf [file am8b10992_si_001.pdf]

## **Supporting Information**

### **Title**

Combinatorial Surface Roughness Effects on Osteoclastogenesis and Osteogenesis

### **Authors:**

Yang Zhang<sup>1</sup>, S. Elisa Chen<sup>1,2</sup>, Jinlong Shao<sup>1</sup>, Jeroen JJP van den Beucken<sup>1\*</sup>

### **Affiliations:**

1 Department of Biomaterials, Radboud University Medical Center, Nijmegen 6525 GA, the Netherlands

2 Department of Veterinary medical science, University of Bologna, Bologna 40126, Italy

\* Corresponding author: [Jeroen.vandenbeucken@radboudumc.nl](mailto:Jeroen.vandenbeucken@radboudumc.nl)

Department of Biomaterials (309), Radboud University Medical Center

PO Box 9101, Nijmegen 6525 GA, the Netherlands

**Table S1. qPCR primer sequences of target genes for osteoclast differentiation and osteogenic differentiation.**

| Gene name          | Forward primer sequence  | Reversed primer sequence |
|--------------------|--------------------------|--------------------------|
| <i>mGAPDH</i>      | TGACCACAGTCCATGCCATC     | GACGGACACATTGGGGGTAG     |
| <i>mRANK</i>       | GCAGCTCAACAAGGATACGG     | GGTGCAGTTGGTCCAAGGTT     |
| <i>mMMP-9</i>      | GGGCGTGTCTGGAGATTCG      | CACCTGGTTCACCTCATGGTC    |
| <i>mCTSK</i>       | CCAGTTTTACAGCAGAGGTGTG   | CTTGCTTCCCTTCTGGGTG      |
| <i>mTRAP</i>       | CACTCCCACCCTGAGATTTGT    | CATCGTCTGCACGGTTCTG      |
| <i>rGAPDH</i>      | CTTCACCACCATGGAGAAGGC    | GGCATGGACTGTGGTCATGAG    |
| <i>rRunx2</i>      | GAGCACAAACATGGCTGAGA     | TGGAGATGTTGCTCTGTTCG     |
| <i>rCollagen I</i> | GAGCGATTACTACTGGATTGACCC | CAAGGAATGGCAGGCGAGAT     |
| <i>rALP</i>        | GGGACTGGTACTCGGATAACGA   | CTGATATGCGATGTCCTTGCA    |
| <i>rOCN</i>        | CGACTCTGAGTCTGACAAA      | GCCGGAGTCTATTACACCACCTT  |

**Table S2. qPCR primer sequences of clastokines.**

| Gene name            | Forward primer sequence | Reversed primer sequence |
|----------------------|-------------------------|--------------------------|
| <i>mGAPDH</i>        | TGACCACAGTCCATGCCATC    | GACGGACACATTGGGGGTAG     |
| <i>mWnt10b</i>       | TCGATACCCACAACCGCAACT   | AAGAGGCGGCTGGTCTTGTT     |
| <i>mBMP-6</i>        | AAGGCTACGCTGCCAACTACT   | AGCATGGTTTGGGGACGTACT    |
| <i>mSPHK1</i>        | CGAACGGAAGAACCATGCCAG   | GGAGGCTACACAGGGGTTTCT    |
| <i>mCTHRC1</i>       | TGCGAGTTCTGTTCAGTGGCT   | ATGGCTTCGATGGGAAGAGGT    |
| <i>mSclerotin</i>    | CACTACACCCGCTTCCTGACA   | TCCGGGATGCAGCGGAAATC     |
| <i>mSemaphorin4D</i> | TATGCGGTCTTCACCCACAG    | TGTCGATACACGCTCCAGGTC    |

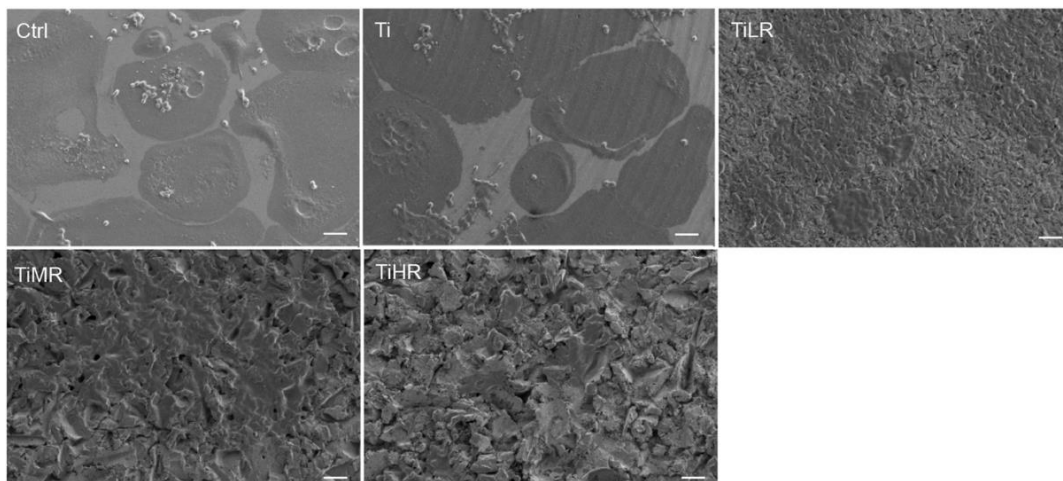

**Figure S1. Morphologies of different rough surfaces and osteoclasts induced on these different surfaces.** RAW264.7 macrophages were grown on glass control and different rough titanium surfaces and induced with RANKL for 4 days and their morphology imaged by SEM. Scale bar is 10  $\mu$ m in all panels.

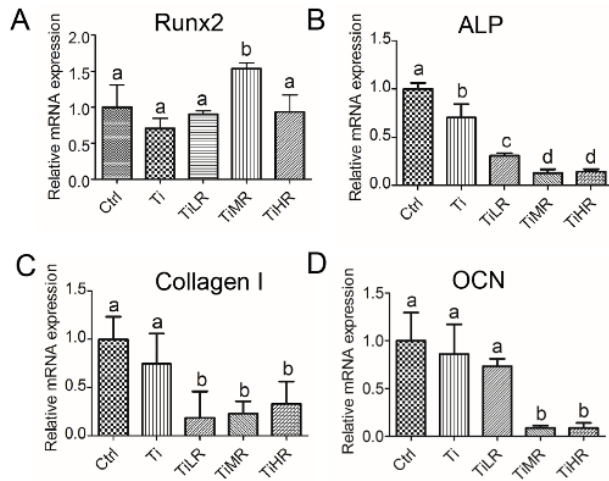

**Figure S2. Gene expression of osteogenic markers in mouse osteoprogenitor cells cultured in conditioned medium of different types of osteoclasts.** Mouse osteoprogenitor cells (MC3T3) were cultured in the conditioned medium of RAW264.7 derived osteoclasts on glass control and different titanium rough surfaces for 7 days. Gene expression of osteogenic markers including **(A)** Runx2 (n = 3), **(B)** ALP (n = 3), **(C)** Collagen I (n = 3) and **(D)** OCN (n = 3) were analyzed. A significant difference was indicated by a, b, c, d. Groups with different letters mean significant difference and groups sharing the same letter are not significantly different.

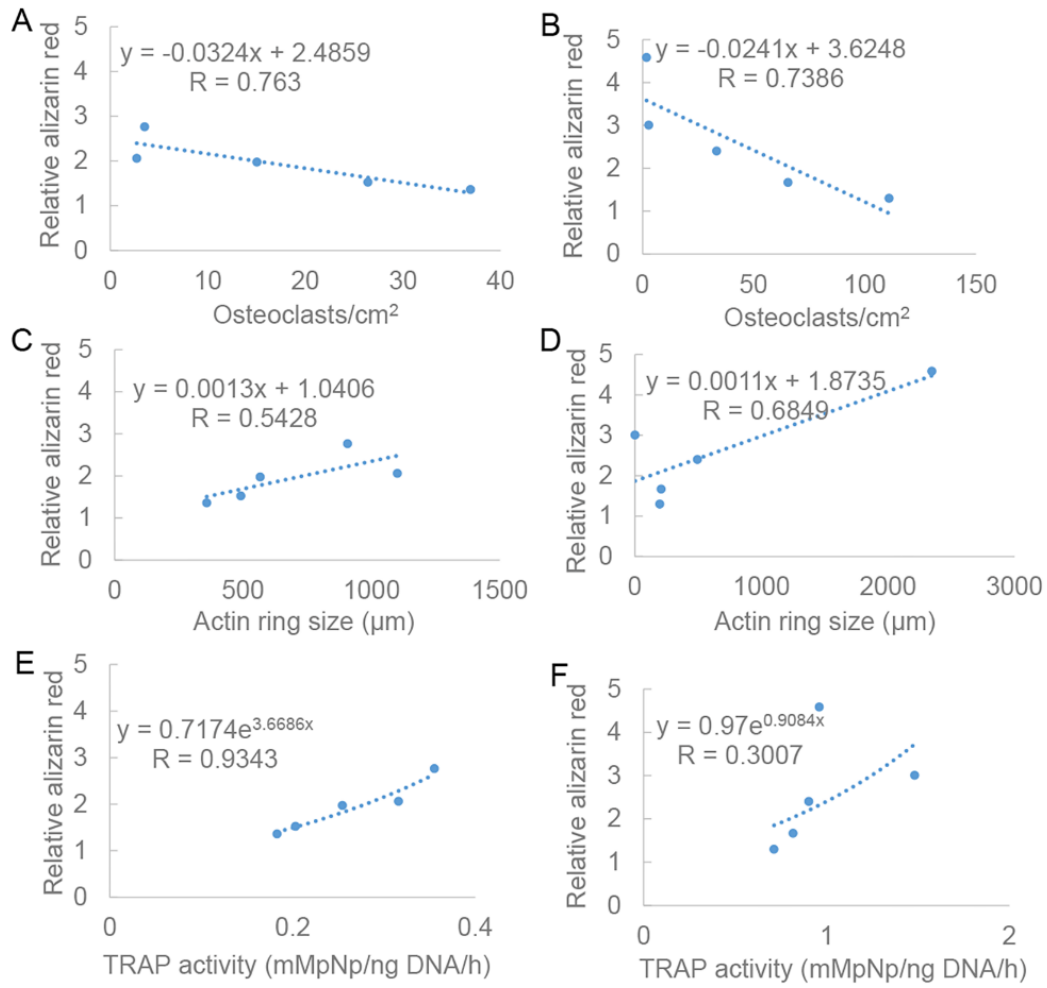

**Figure S3. The coupling between osteoclast phenotype and its anabolic effects.** Number of osteoclast per  $\text{cm}^2$  of (A) RAW264.7 derived osteoclasts and (B) primary osteoclasts, actin ring size of (C) RAW264.7 derived osteoclasts and (D) primary osteoclasts, and TRAP activity of (E) RAW264.7 derived osteoclasts and (F) primary osteoclasts induced by different surface roughness was coupled with their anabolic effects on osteoblastic cells.
